# Supplementary material
Source: HighWire-hosted journal article supplement (http://www.qdcxjkg.com/highwire/filestream/113633/field_highwire_adjunct_files/0/ERJ-01294-2012_Disclosures.pdf)
Supplement: ERJ-01294-2012_Disclosures.pdf [file ERJ-01294-2012_Disclosures.pdf]

**M.G. Aabye:** Copenhagen University Hospitals, Hvidovre holds pending and issued patents disclosing the use of IP-10 as a diagnostic marker for infection with *M. tuberculosis*, I am registered as co-inventor. I have co-authored reviews on the use of IP-10 as a biomarker for infection with *M. tuberculosis*.

**J. Eugen-Olsen** is mentioned as a co-inventor on patents owned by Hvidovre Hospital on the use of IP-10 for diagnosing disease.

**P. Ravn:** Copenhagen University Hospitals, Hvidovre holds pending and issued patents disclosing the use of IP-10 as a diagnostic marker for infection with *M. tuberculosis*, I am registered as inventor. I have co-authored reviews on the use of IP-10 as a biomarker for infection with *M. tuberculosis*.

**M. Ruhwald:** Copenhagen University Hospitals, Hvidovre holds pending and issued patents disclosing the use of IP-10 as a diagnostic marker for infection with *M. tuberculosis*; I am registered as inventor on said patents and employed by the same institution. In 2009 I received a travel grant by Cellestis to attend a conference in IGRAs. I have co-authored reviews on the use of IP-10 as a biomarker for infection with *M. tuberculosis*.
